# Supplementary material for: Headache service quality evaluation: implementation of quality indicators in primary care in Europe
Source: PubMed Central journal article supplement (PMC8080333; doi:10.1186/s10194-021-01236-4), 2021-04-28
Supplement: 10194_2021_1236_MOESM4_ESM.pdf [file 10194_2021_1236_MOESM4_ESM.pdf]

10.03.2014

**Lifting The Burden**  
in Official Relations  
with the World Health Organization

The Global Campaign against Headache

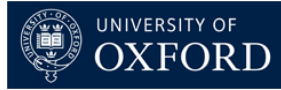

Add logo of local  
collaborator

## Research Project: Evaluation of headache service quality

[list the local collaborator(s)]

---

### Secretary/appointments administrator's questionnaire

Under the auspices of the Global Campaign against Headache, headache centres in Europe and the United States, and the University of Oxford in the UK, are collaborating to define and measure *quality* of headache care. This is a step towards making improvements in headache care at local, national and international levels.

A multi-dimensional definition of quality has been agreed, along with a set of quality indicators. This study is an evaluation of the quality indicators implemented in specialist headache centres. Health-care providers, patients and administrative staff are asked to complete short questionnaires, and a review of randomly selected patients' records is conducted.

If the study is successful, it will be followed by studies in other settings, including primary care. Ultimately, the quality indicators, once validated, will be used to improve headache services.

There are five short questionnaires. This one of only 4 questions is aimed at whoever is responsible for making or administering appointments. Please complete it by ticking the relevant box for each question. Once you have done so, please return it to [local collaborator].

First please indicate whether you are:

Secretary            Administrator     

and the date of completion:      \_\_\_\_/\_\_\_\_/20\_\_

**1. Does a formal triage system exist in your headache service?**

(this means any system during the first telephone contact, or on receipt of a referral letter, that identifies patients' particular needs and reacts accordingly)

- yes
- no

**2. Is your triage system designed to pick out potentially urgent cases for early appointments?**

(for example, patients with cluster headache)

- yes
- no

**3. Does a referral pathway exist from primary care to your headache service?**

- yes
- no

**4. Does this pathway permit, and respond to, urgent referral when needed?**

- yes
- no
- not applicable

|                        |
|------------------------|
| <b>Office use only</b> |
| <b>B1a</b>             |
| <b>B1a</b>             |
| <b>C1b</b>             |
| <b>C2b</b>             |

Please add further comments, if any, below:

**Thank you for completing the questionnaire. Please return it to [local collaborator]**
