# Supplementary material for: Headache service quality evaluation: implementation of quality indicators in primary care in Europe
Source: PubMed Central journal article supplement (PMC8080333; doi:10.1186/s10194-021-01236-4), 2021-04-28
Supplement: 10194_2021_1236_MOESM6_ESM.pdf [file 10194_2021_1236_MOESM6_ESM.pdf]

# Lifting The Burden

In official relations with  
the World Health Organization

**The Global Campaign against Headache**

## Application of Quality Indicators for Headache Care Services

### Non-expert records review

|                                                                            | <b>Indicator</b>                                                 | <b>Measure</b>                                                                                                                                                      | <b>Application</b>                                                                                                                                                                                                           | <b>Evaluator</b>                                       |
|----------------------------------------------------------------------------|------------------------------------------------------------------|---------------------------------------------------------------------------------------------------------------------------------------------------------------------|------------------------------------------------------------------------------------------------------------------------------------------------------------------------------------------------------------------------------|--------------------------------------------------------|
| <b>Domain A. Accurate diagnosis is essential for optimal headache care</b> |                                                                  |                                                                                                                                                                     |                                                                                                                                                                                                                              |                                                        |
| <b>A1</b>                                                                  | Patients are asked about the temporal profile of their headaches | a) Duration of presenting complaint is recorded in patient's record (yes/no)<br><br>b) Frequency or days/month of symptoms is recorded in patient's record (yes/no) | a) Review of relevant fields in records of retrospective (random or consecutive) sample of patients (n=50)<br><br>b) Review of relevant fields in records of retrospective (random or consecutive) sample of patients (n=50) | a) % yes exceeds target<br><br>b) % yes exceeds target |

|                                                                                   |                                                                              |                                                                                                                         |                                                                                                                                                                                                                                     |                                                                      |
|-----------------------------------------------------------------------------------|------------------------------------------------------------------------------|-------------------------------------------------------------------------------------------------------------------------|-------------------------------------------------------------------------------------------------------------------------------------------------------------------------------------------------------------------------------------|----------------------------------------------------------------------|
| <b>A2</b>                                                                         | Diagnosis is according to current ICHD criteria                              | <p>a) Diagnosis is recorded in patient's record (yes/no)</p> <p>b) Diagnostic record uses ICHD terminology (yes/no)</p> | <p>a) Review of relevant fields in records of retrospective (random or consecutive) sample of patients (n=50)</p> <p>b) Review of relevant fields in records of retrospective (random or consecutive) sample of patients (n=50)</p> | <p>a) % yes exceeds target</p> <p>b) % yes exceeds target</p>        |
| <b>A3</b>                                                                         | A working diagnosis is made at the first visit                               | Working diagnosis at first visit is recorded in patient's record (yes/no)                                               | Review of relevant fields in records of retrospective (random or consecutive) sample of patients (n=50)                                                                                                                             | % yes exceeds target                                                 |
| <b>A4</b>                                                                         | A definitive diagnosis is made at first or subsequent visit                  | Definitive diagnosis is recorded in patient's record or, if not, an appointment for review has been given (yes/no)      | Review of relevant fields in records of retrospective (random or consecutive) sample of patients (n=50)                                                                                                                             | % yes exceeds target                                                 |
| <b>Domain B. Individualized management is essential for optimal headache care</b> |                                                                              |                                                                                                                         |                                                                                                                                                                                                                                     |                                                                      |
| <b>B4</b>                                                                         | Treatment plans include psychological approaches to therapy when appropriate | c) Utilization of access route to psychological therapies is recorded in service records                                | c) Review of service records over preceding 6 months                                                                                                                                                                                | c) Utilization rate is within predictions for setting (benchmarking) |
